# Supplementary material
Source: PubMed Central journal article supplement (PMC3320136)
Supplement: 11_238_Bu.Suppl.pdf [file 11_238_Bu.Suppl.pdf]

Supplemental Data

**c-Met Inhibitor Synergizes with Tumor Necrosis Factor-Related Apoptosis-Induced Ligand to Induce Papillary Thyroid Carcinoma Cell Death**

Rong Bu,<sup>1\*</sup> Shahab Uddin,<sup>1\*</sup> Maqbool Ahmed,<sup>1</sup> Azhar R Hussain,<sup>1</sup> Saif Alsobhi,<sup>2</sup> Tarek Amin,<sup>3</sup> Abdurahman Al-Nuaim,<sup>3</sup> Fouad Al-Dayel,<sup>4</sup> Jihad Abubaker,<sup>1</sup> Prashant Bavi,<sup>1</sup> and Khawla S Al-Kuraya<sup>1</sup>

Online address: <http://www.molmed.org>

The Feinstein Institute for Medical Research 

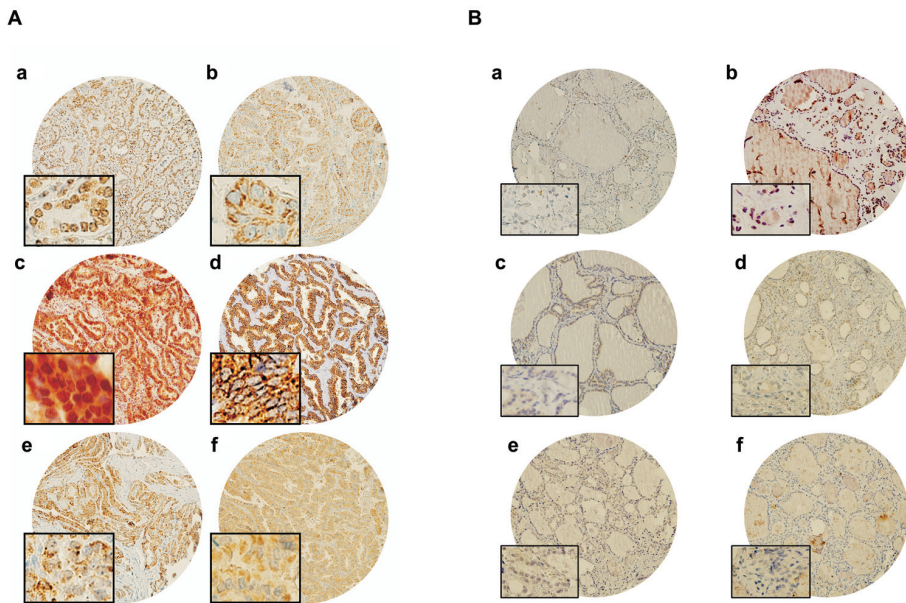

**Supplementary Figure 1.** Tissue microarray based immunohistochemical analysis of p-Met, TRAIL-R2 or DR5, p-AKT, BCL-XL, XIAP and HGF in PTC patients neoplastic thyroid tissue and non-neoplastic normal thyroid tissue. A: The Array spot showing high expression of p-Met (a) DR5 (b), p-AKT(c), Bcl-XL (d), XIAP (e) and HGF (f) in in PTC patients neoplastic thyroid tissue. B: The Array spot showing lower expression level of p-Met (a) DR5 (b), p-AKT(c), Bcl-XL (d), XIAP (e) and HGF in non-neoplastic normal thyroid tissue. 20 X/0.70 objective on an Olympus BX 51 microscope. (Olympus America Inc, Center Valley, PA, USA. with the inset showing a 40X 0.85 aperture magnified view of the same.

PHA665752-MEDIATED CELL DEATH IN PTC

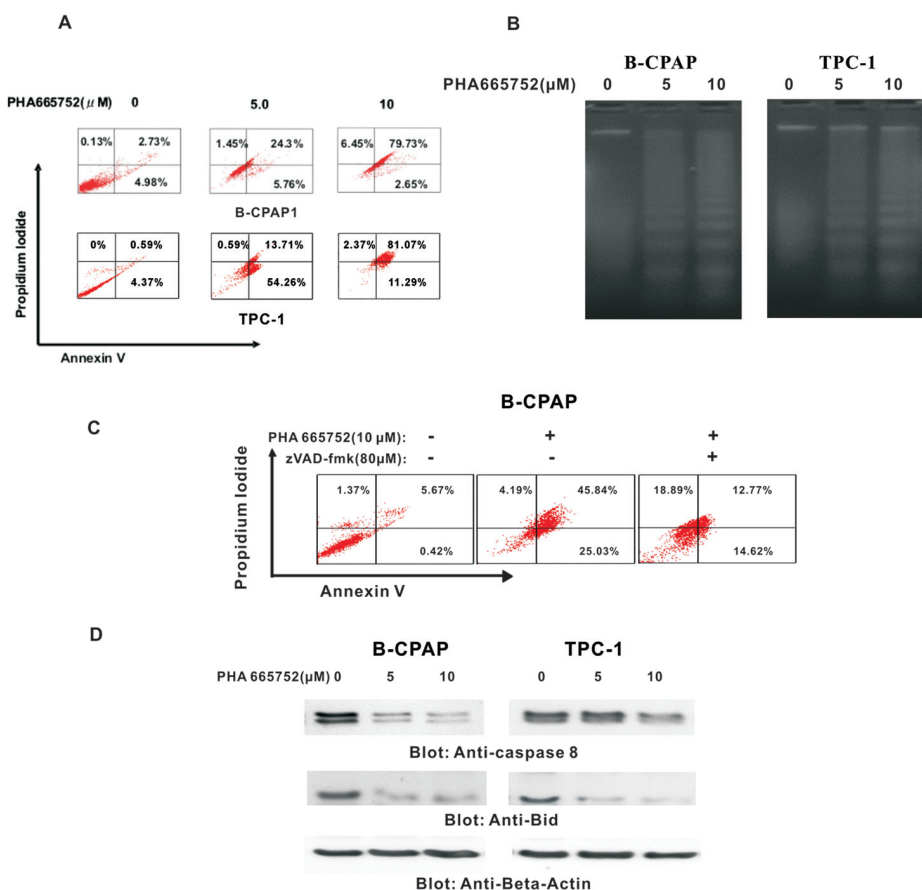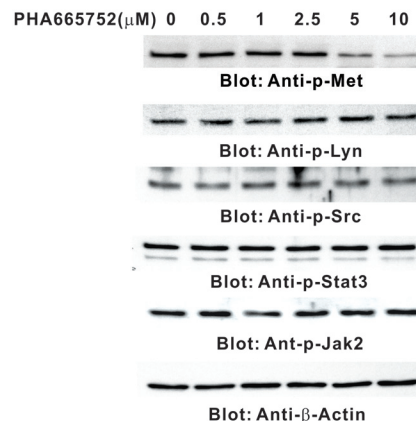

**Supplementary Figure 3.** PHA665752 treatment did not affect phosphorylation of Lyn, stat3, Jak2 and Src. B-CPAP cells were treated with 0, 0.5, 1, 2.5, 5 and 10 μM PHA665752 for 4 h. After cell lysis, equal amounts of proteins were separated by SDS-PAGE, transferred to immobilized membrane, and immunoblotted with antibodies against p-Met, p-Lyn, p-stat3, p-Jak2, p-Src and β-actin.

**Supplementary Figure 2.** A: PHA 665752-induced apoptosis detected by Annexin V/propidium iodide dual staining. B-CPAP and TPC-1 cells were treated with various doses of PHA 665752 (as indicated) for 24 h and cells were subsequently stained with fluorescein-conjugated Annexin V and propidium iodide and analyzed by flow cytometry. B: PHA 665752-induced apoptosis detected by DNA laddering. B-CPAP and TPC-1 cells were treated with PHA 665752 as indicated for 24 h, and DNA was extracted and separated by electrophoresis on 1.2% agarose gel. C: Effect of zVAD/fmk on PHA665752-induced apoptosis detected by Annexin V/propidium iodide dual staining. B-CPAP cells were pre-treated with 80 μM zVAD/fmk for 2 h and subsequently treated with 10 μM PHA665752 for 24 h, and then cells were stained with fluorescein-conjugated Annexin V and propidium iodide and analyzed by flow cytometry. D: PHA665752-induced activation of caspase 8 and cleavage of Bid. B-CPAP and TPC-1 cells were treated with various doses of PHA665752 as indicated for 24 h. Cells were lysed and equal amounts of proteins were separated by SDS-PAGE, transferred to PVDF membrane and immunoblotted with antibodies against caspase 8 and Bid. The blots were probed with an antibody against beta-actin for equal loading.

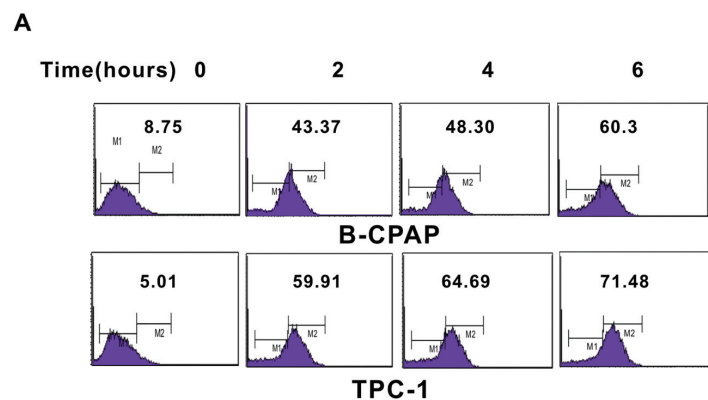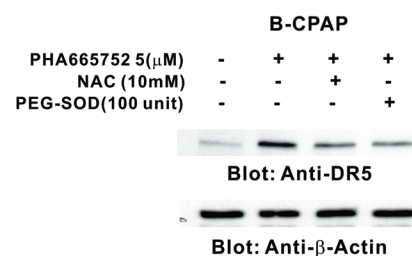

**Supplementary Figure 5.** B-CPAP cells were pre-treated with 10mM NAC and 100 units PEG-SOD for 2 h, followed by 5  $\mu$ M PHA665752 treatment for 24 h. After cell lysis, equal amounts of proteins were separated by SDS-PAGE, transferred to immunoblon membrane, and immunoblotted with antibodies against DR5 and  $\beta$ -actin.

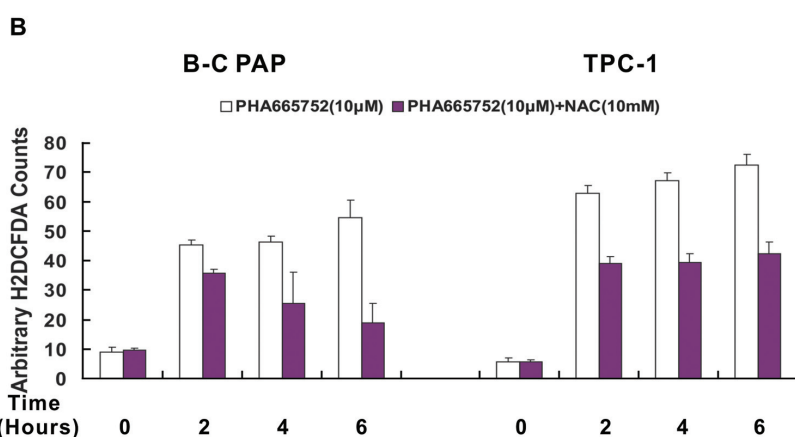

**Supplementary Figure 4.** A: Increase of ROS generation in PHA665752 treated PTC cells. B-CPAP and TPC-1 cells were treated with PHA665752 10 $\mu$ M for 0, 2, 4 and 6 h respectively, then loaded with 10 $\mu$ M H2DCFDA and incubated at 37°C for 45 min. After washing with PBS, cells were re-suspended in PBS and immediately analyzed using flow cytometry for intracellular accumulation of ROS. B: B-CPAP and TPC-1 cells were pre-treated with 10mM NAC for two hours followed by treatment with 10 $\mu$ M PHA665752 for indicated time periods, then loaded with 10 $\mu$ M H2DCFDA and incubated at 37°C for 45 min. After washing with PBS, cells were re-suspended in PBS and immediately analyzed using flow cytometry for intracellular accumulation of ROS.

**Supplementary Table 1** Antibodies used for tissue microarray immunohistochemical analysis.

| Antibody      | Clone      | Company         | Source            | Dilution* | Antigen Retrieval | Subcellular Localization | Detection System |
|---------------|------------|-----------------|-------------------|-----------|-------------------|--------------------------|------------------|
| p-MET         | Polyclonal | Invitrogen      | Rabbit            | 1:300     | pH6, PC           | Nuclear                  | EnVision+        |
| DR5           | TNFRSF10B  | R&D             | Goat              | 1:1000    | pH6, PC           | Cytoplasmic              | EnVision+        |
| HGF           | Polyclonal | SCBT            | Rabbit            | 1:1000    | pH9, PC           | Cytoplasmic              | EnVision+        |
| P110 $\alpha$ | C73F8      | Cell signalling | Rabbit            | 1:100     | pH9, MW           | Cytoplasmic              | EnVision+        |
| p-AKT         | Ser 473    | Cell signalling | Rabbit            | Predilute | pH9, MW           | Nuclear/Cytoplasmic      | EnVision+        |
| PTEN          | 6H2.1      | Cascade         | Mouse             | 1:300     | pH9, MW           | Cytoplasmic              | Envision+        |
| XIAP          | 48         | BD Transduction | Mouse monoclonal  | 1:300     | pH9, MW           | Cytoplasmic              | EnVision+        |
| BCLXL         | 54H6       | Cell Signalling | Rabbit polyclonal | 1:800     | pH9, MW           | Cytoplasmic              | EnVision+        |

\*-Over night incubation

PC: Pressure cooker

MW: Microwave

P110 $\alpha$ : Phosphatidylinositol 3 kinase catalytic subunit-110 $\alpha$
